# Supplementary material for: Polyoxometalates tailoring of frustrated Lewis pairs on Ce-doped Bi2O3 for boosting photocatalytic CO2 reduction
Source: Royal Society of Chemistry journal article supplement (doi:10.1039/d4cc02452d), 2024-01-01
Supplement: d4cc02452d1.pdf [file d4cc02452d1.pdf]

## Supplementary Material

### Polyoxometalates tailoring of frustrated Lewis pairs on Ce-doped Bi<sub>2</sub>O<sub>3</sub> for boosting photocatalytic CO<sub>2</sub> reduction

Jiayu Zhu<sup>a</sup>, Hongshan Zhou<sup>a</sup>, Xiaojing Liang<sup>b</sup>, Pengfei Feng<sup>a</sup>, Shijiao Zhao<sup>a</sup>, Yuhe Sun<sup>a</sup>, Baochun Ma<sup>a</sup>, Yong Ding<sup>a,c,\*</sup>, Xinbao Han<sup>a\*</sup>

<sup>a</sup> State Key Laboratory of Applied Organic Chemistry, College of Chemistry and Chemical Engineering, Lanzhou University, Lanzhou 730000, China.

<sup>b</sup> CAS Key Laboratory of Chemistry of Northwestern Plant Resources and Key Laboratory for Natural Medicine of Gansu Province, Lanzhou Institute of Chemical Physics, Chinese Academy of Sciences, Lanzhou 730000, China

<sup>c</sup> State Key Laboratory of Chemical Resource Engineering, Beijing University of Chemical Technology, Beijing 100029, China

\*Corresponding authors.

E-mail: dingyongl@lzu.edu.cn (Y.Ding)

hanxinbao@lzu.edu.cn (X. Han); xinbao\_han@163.com

#### 1. Experimental section

##### 1.1. Materials and reagents

All salts and other chemicals were of the highest purity available from commercial sources without further purification. DI water (18.25 MΩ·cm) applied in all the experiments was attained from a Molecular Lab Water Purifier.

##### 1.2. Synthesis of Bi<sub>2</sub>O<sub>3</sub>

Bi<sub>2</sub>O<sub>3</sub> was synthesized via a reported synthetic method.<sup>1</sup> 1.02 g of benzenetetracarboxylic acid (BTA) was dissolved in 75 mL ethanol as solution A, 2 mmol Bi(NO<sub>3</sub>)<sub>3</sub>·5H<sub>2</sub>O was dissolved in 75 mL deionized water as solution B. Then, solution A was mixed with solutions B in a three necked flask and kept at 80 °C for 1 h, and naturally cooled to room temperature. The obtained white precipitates were washed with water and ethanol for several times, and then placed in a vacuum drying apparatus overnight for further use. The obtained white precipitates were directly

annealed in air at 600 °C for 3 h, and then cooled to room temperature.

### 1.3. Synthesis of $\text{CeBiO}_x$

$\text{CeBiO}_x$  was synthesized via a reported synthetic method.<sup>1</sup> 1.02 g of benzenetetracarboxylic acid (BTA) was dissolved in 75 mL ethanol, named as solution A. X mmol  $\text{Ce}(\text{NO}_3)_3 \cdot 6\text{H}_2\text{O}$  was dissolved in 75 mL deionized water as solution B, and Y mmol  $\text{Bi}(\text{NO}_3)_3 \cdot 5\text{H}_2\text{O}$  was dissolved in 75 mL deionized water as solution C. Then, solution A was mixed with solutions B and C in a three necked flask and kept at 80 °C for 1 h, and naturally cooled to room temperature. The obtained white precipitates were washed with water and ethanol for several times, and then placed in a vacuum drying apparatus overnight for further use. The obtained white precipitates were directly annealed in air at 600 °C for 3 h, and then cooled to room temperature. By controlling the molar amount of added  $\text{Ce}(\text{NO}_3)_3 \cdot 6\text{H}_2\text{O}$  and  $\text{Bi}(\text{NO}_3)_3 \cdot 5\text{H}_2\text{O}$ , the Ce-doping contents were controlled. The molar ratios of  $\text{Ce}(\text{NO}_3)_3 \cdot 6\text{H}_2\text{O}$  to  $\text{Bi}(\text{NO}_3)_3 \cdot 5\text{H}_2\text{O}$  are 1:1, 1:2 and 2:1, respectively.

### 1.4. Synthesis of $\text{Na}_{16}[\text{Cu}_4(\text{H}_2\text{O})_2(\alpha\text{-P}_2\text{W}_{15}\text{O}_{56})_2] \cdot 42\text{H}_2\text{O}$ (**Cu<sub>4</sub>**)

The **Cu<sub>4</sub>** POM was prepared according to the reported method.<sup>2</sup> In a 100 mL beaker, a solution of  $\text{CuCl}_2 \cdot 2\text{H}_2\text{O}$  (0.43 g, 2.50 mmol) and NaCl (2.92 g dissolved in 50 mL distilled water) was charged. Solid  $\text{Na}_{12}[\alpha\text{-P}_2\text{W}_{15}\text{O}_{56}] \cdot 18\text{H}_2\text{O}$  (5.00 g, 1.25 mmol) was added in one portion, and the mixture was stirred and heated to boiling. The color was changed from blue to bright lime green. The hot, turbid solution was filtered. The crystals were produced from the clear yellow-green solution within a few minutes. The filtrate was cooled to room temperature, stoppered, and placed in a refrigerator at 5 °C overnight. The resulting lime green crystals were collected by filtration, washed with absolute ethanol ( $3 \times 10$  mL), and then with absolute ether ( $3 \times 10$  mL). The **Cu<sub>4</sub>** POM was obtained as a lime green powder.

### 1.5. Synthesis of $(\text{NH})_4[\text{H}_6\text{CuMo}_6\text{O}_{24}] \cdot 4\text{H}_2\text{O}$ (**CuMo<sub>6</sub>**)

The **CuMo<sub>6</sub>** POM was synthesized according to the literature.<sup>3</sup> 2.65 g ammonium molybdate was weighed and dissolved in an 80 mL of deionized water. The solution was heated to boiling named as solution A. Then, 0.749 g  $\text{CuSO}_4 \cdot 5\text{H}_2\text{O}$  was dissolved

in 29 mL of deionized water to obtain solution B. Solution B was dropped into solution A slowly and then cooled to room temperature. The mixture was evaporated to 30 mL by a rotary evaporator. The mixture was then filtered immediately, and the filtrate was allowed to stand for crystallization. Finally, the crystals were collected after washing with ethanol and drying under vacuum.

#### *1.6. Synthesis of $\text{Na}_{12}[(\alpha\text{-SbW}_9\text{O}_{33})_2\text{Cu}_3(\text{H}_2\text{O})_3]\cdot 46\text{H}_2\text{O}$ (**Cu<sub>3</sub>**)*

The **Cu<sub>3</sub>** POM was synthesized according to the literature.<sup>4</sup> Dissolving  $\text{CuCl}_2\cdot 2\text{H}_2\text{O}$  (1.0 g, 5.8 mmol) using 50 mL of ultrapure water, then  $\text{Na}_9[\alpha\text{-SbW}_9\text{O}_{33}]\cdot 19.5\text{H}_2\text{O}$  (10 g, 3.5 mmol) was added. The solution was refluxed for 1 hour at pH 6.2. Then, the solution was cooled and filtered. Finally, the filtrate was slowly evaporated at room temperature to obtain large green crystals of **Cu<sub>3</sub>** POM.

#### *1.7. Synthesis of $\text{Na}_{16}[\text{Ni}_4(\text{H}_2\text{O})_2(\alpha\text{-P}_2\text{W}_{15}\text{O}_{56})_2]\cdot 58\text{H}_2\text{O}$ (**Ni<sub>4</sub>**)*

The **Ni<sub>4</sub>** POM was prepared according to a reported method.<sup>2</sup> In a 100 mL beaker, a solution of  $\text{Ni}(\text{NO}_3)_2\cdot 6\text{H}_2\text{O}$  (0.73 g, 2.50 mmol) and NaCl (2.93 g dissolved in 50 mL distilled water, 1 M) was prepared. Solid  $\text{Na}_{12}[\alpha\text{-P}_2\text{W}_{15}\text{O}_{56}]\cdot 18\text{H}_2\text{O}$  (5.00 g, 1.25 mmol) was added all at once, and the mixture was stirred. The color of the solution changed from fluorescent olive green to bright green. The solution was heated to 50 °C, cooled to room temperature, covered, and placed in a refrigerator at 5 °C overnight. The resulting green crystalline product was filtered, washed with anhydrous ethanol for three times ( $3 \times 10$  mL), followed by washing with anhydrous ether ( $3 \times 10$  mL), and dried in an oven at 50°C to obtain the green powder of **Ni<sub>4</sub>** POM.

#### *1.8. Synthesis of $\text{Na}_{16}[\text{Co}_4(\text{H}_2\text{O})_2(\alpha\text{-P}_2\text{W}_{15}\text{O}_{56})_2]\cdot 58\text{H}_2\text{O}$ (**Co<sub>4</sub>**)*

The **Co<sub>4</sub>** POM was prepared according to a reported method.<sup>2</sup> In a 100 mL beaker, a solution of  $\text{Co}(\text{NO}_3)_2\cdot 6\text{H}_2\text{O}$  (1.83 g, 2.50 mmol) and NaCl (2.93 g dissolved in 50 mL distilled water, 1 M) was prepared. Solid  $\text{Na}_{12}[\alpha\text{-P}_2\text{W}_{15}\text{O}_{56}]\cdot 18\text{H}_2\text{O}$  (5.00 g, 1.25 mmol) was added all at once, and the mixture was stirred. The color of the solution changed from fluorescent olive green to dark reddish-brown, eventually turning wine red with a green hue. The solution was heated to 50°C, cooled to room temperature, covered, and placed in a refrigerator at 5 °C overnight. The resulting brownish-green crystalline

product was filtered, washed with anhydrous ethanol for three times ( $3 \times 10$  mL), followed by washing with anhydrous ether ( $3 \times 10$  mL), and dried in an oven at  $50\text{ }^{\circ}\text{C}$  to obtain the brownish-green powder of **Co<sub>4</sub>** POM.

#### 1.9. Synthesis of $\text{Na}_{16}[\text{Zn}_4(\text{H}_2\text{O})_2(\alpha\text{-P}_2\text{W}_{15}\text{O}_{56})_2] \cdot 16\text{H}_2\text{O}$ (**Zn<sub>4</sub>**)

The **Zn<sub>4</sub>** POM was prepared according to a reported method.<sup>2</sup> In a 100 mL beaker, a solution of  $\text{ZnCl}_2$  (0.34 g, 2.50 mmol) and  $\text{NaCl}$  (2.92 g dissolved in 50 mL distilled water, 1 M) was prepared. Solid  $\text{Na}_{12}[\alpha\text{-P}_2\text{W}_{15}\text{O}_{56}] \cdot 18\text{H}_2\text{O}$  (5.00 g, 1.25 mmol) was immediately added with vigorous stirring and heating. The solution was heated to  $80\text{ }^{\circ}\text{C}$  to generate a turbid solution, followed by hot filtration. The clear filtrate was collected in a preheated 100 mL beaker and placed in a refrigerator at  $5\text{ }^{\circ}\text{C}$  overnight. The product was recovered on a suction filter funnel, washed with anhydrous ethanol for three times ( $3 \times 10$  mL), followed by washing with anhydrous ether ( $3 \times 10$  mL), and dried in an oven at  $50\text{ }^{\circ}\text{C}$  to obtain a white powder of **Zn<sub>4</sub>** POM.

#### 1.10. Synthesis of POMs/ $\text{CeBiO}_x$

20 mg of  $\text{CeBiO}_x$  was dispersed in 25 mL beaker with 10 mL of water and sonicated for uniform dispersion. The POMs (**Cu<sub>3</sub>**, **Cu<sub>4</sub>**, **Ni<sub>4</sub>**, **Co<sub>4</sub>**, **Zn<sub>4</sub>**, **CuMo<sub>6</sub>**) were added to the  $\text{CeBiO}_x$  dispersion and stirred. The dispersion was stirred overnight at room temperature. After overnight stirring, the POMs/ $\text{CeBiO}_x$  product was separated by centrifugation, followed by water washing. The products were then dried in a vacuum oven and used for various characterization and catalytic experiments. The resulting samples were named as **Cu<sub>3</sub>**/ $\text{CeBiO}_x$ , **Cu<sub>4</sub>**/ $\text{CeBiO}_x$ , **Ni<sub>4</sub>**/ $\text{CeBiO}_x$ , **Co<sub>4</sub>**/ $\text{CeBiO}_x$ , **Zn<sub>4</sub>**/ $\text{CeBiO}_x$  and **CuMo<sub>6</sub>**/ $\text{CeBiO}_x$ .

#### 1.11. Synthesis of X wt.% **Cu<sub>3</sub>**/ $\text{CeBiO}_x$

20 mg of  $\text{CeBiO}_x$  was dispersed in 25 mL beaker with 10 mL of water and sonicated for uniform dispersion. Different X wt.% **Cu<sub>3</sub>** (X = 0, 1 wt.%, 3 wt.%, 5 wt.% and 7 wt.%) were added to the  $\text{CeBiO}_x$  dispersion and stirred. The dispersion was stirred overnight at room temperature. After overnight stirring, the X wt.% **Cu<sub>3</sub>**/ $\text{CeBiO}_x$  products were separated by centrifugation, followed by water washing. The products were then dried in a vacuum oven. The mass fractions of **Cu<sub>3</sub>** in different samples were

0, 1 wt.%, 3 wt.%, 5 wt.% and 7 wt.%, and the resulting samples were named as 1%  $\text{Cu}_3/\text{CeBiO}_x$ , 3%  $\text{Cu}_3/\text{CeBiO}_x$ , 5%  $\text{Cu}_3/\text{CeBiO}_x$  and 7%  $\text{Cu}_3/\text{CeBiO}_x$ .

#### *1.12. Synthesis of 5% $\text{Cu}_3/\text{Bi}_2\text{O}_3$*

In a typical electrostatic adsorption process, 20 mg of  $\text{CeBiO}_x$  was dispersed in 25 mL beaker with 10 mL of water and sonicated for uniform dispersion. X wt.%  $\text{Cu}_3$  was added to the  $\text{CeBiO}_x$  dispersion and stirred. The dispersion was stirred overnight at room temperature. After overnight stirring, the 5 wt.%  $\text{Cu}_3/\text{CeBiO}_x$  product was separated by centrifugation, followed by water washing. The product was then dried in a vacuum oven.

#### *1.13. Characterization*

Ultrapure water ( $18.2 \text{ M}\Omega\cdot\text{cm}$ ) for the preparation of solutions was attained from a Molecular Lab Water Purifier. X-ray photoelectron spectroscopy (XPS) spectra were measured by Shimadzu Axis Supra with X-ray monochromatisation. The binding energy of each element was corrected by C 1s peak (284.6 eV) from residual carbon. Infrared transmission spectra were collected using a Fourier Transform infrared (FT-IR) spectrophotometer (Nicolet iS5, Thermo Fisher SCIENTIFIC, America). XRD patterns were recorded on a Rigaku Ultima IV diffractometer with Cu  $K\alpha$  radiation ( $\lambda = 1.5418 \text{ \AA}$ ) and a graphite monochromator from  $5^\circ$  to  $50^\circ$  at a scanning rate of  $5^\circ/\text{min}$ . UV-vis diffuse absorption spectra were recorded on an UV-2600 UV-vis spectrophotometer (Shimadzu Corp.) equipped with an integrating sphere using  $\text{BaSO}_4$  as the reference. Transmission electron microscopy (TEM), high-resolution transmission electron microscopy (HRTEM) and the corresponding EDX mapping images were collected on a Tecnai F30 operating at a 200 kV accelerating voltage. Raman measurements were acquired using a Lab RAM HR Evolution Reflex Raman confocal microscope (HORIBA FRANCE SAS, France), equipped with a diode laser emitting at 532 nm. The liquid product was confirmed by a Liquid Nuclear Magnetic Resonance Spectrometer (NMR, JNM-ECS 400M, JEOL, Japan). Mott-Schottky measurements, electrochemical impedance spectroscopy (EIS), and time-resolved photocurrent behaviors were performed on the electrochemical workstation (CH Instruments Ins.) in

a 3-electrode configuration with the assembled photoelectrodes (as-prepared materials on FTO glass) as the working electrode, the Pt slice as the counter electrode and the Ag/AgCl as the reference electrode. 0.5 M Na<sub>2</sub>SO<sub>4</sub> solution was used as the electrolyte.

#### *1.14. Photocatalytic CO<sub>2</sub> reduction measurement*

The photocatalytic CO<sub>2</sub> reduction reaction was carried out in a 50 mL quartz reaction vessel with a top illumination design.

Accurately weigh 5.00 mg of catalyst and place it in the reaction vessel. Add the reaction solution, which consists of water (H<sub>2</sub>O), acetonitrile (CH<sub>3</sub>CN) and the sacrificial electron donor triethanolamine (TEOA), in a volume ratio of V(TEOA) : V(H<sub>2</sub>O) : V(CH<sub>3</sub>CN) = 1 : 2 : 3. Before illumination, perform a gas displacement operation by continuously passing ultra-pure CO<sub>2</sub> ( $\geq 99.999\%$ ) gas through the reaction vessel for 20 min to remove the air from the reaction vessel.

The top of the reaction vessel is equipped with a 300 W xenon lamp (100 mW cm<sup>-2</sup>) as the light source. During the irradiation process, approximately 1 mL of gas sample is taken from the stainless steel reactor and injected into a gas chromatograph GC9790 Plus. The products are sequentially quantitatively analyzed every 1 hour, with CH<sub>4</sub>, CO and H<sub>2</sub> being detected. The gas chromatograph is equipped with a flame ionization detector (FID) and a thermal conductivity detector (TCD). The production rate is derived based on the calibration curve. Throughout the measurement process, the temperature of the entire reaction chamber is maintained at around 25 °C. The liquid products are studied using nuclear magnetic resonance spectroscopy. A mixture of 0.5 mL of the reaction solution and 0.1 mL of D<sub>2</sub>O (containing 0.05  $\mu$ L of dimethyl sulfoxide (DMSO) as an internal standard) is prepared to obtain the NMR signal.

**Cyclic tests:** The cyclic experimental testing is conducted as follows: After the first reaction, the catalyst is washed and recovered by rinsing with acetonitrile, ethanol, and water, followed by centrifugation. Then, the catalyst is used for the second reaction experiment. After the second reaction, the catalyst is washed and recovered again by rinsing with acetonitrile, ethanol, and water, followed by centrifugation for the third experiment, and so on. This process is repeated for a total of five tests.

### *1.15. Photoelectric performance evaluation*

Preparation of FTO Working Electrodes: Add 5.00 mg of catalyst to 1 mL of anhydrous ethanol and a mixture solution composed of 5  $\mu$ L of 5% Nafion. Sonicate the suspension for half an hour, then use a pipette to evenly drop the solution onto the FTO substrate. Dry the coated substrate under an infrared lamp, and finally, dry it at 60  $^{\circ}$ C for 1 h in a convection oven.

Mott-Schottky test is performed at frequencies of 500 Hz, 1000 Hz and 1500 Hz with a step size of 5 mV. Electrochemical Impedance Spectroscopy (EIS) test is conducted over a frequency range of  $10^{-2}$  to  $10^5$  Hz with an amplitude of 10 mV. Photocurrent measurement involves periodically switching between dark and illuminated conditions every 40 s to obtain the current density under dark and illuminated conditions.

The conversion relationship between the working voltage relative to the reference electrode (Ag/AgCl) and the standard hydrogen electrode (NHE) is given by:  $E_{\text{NHE}} = E_{\text{Ag/AgCl}} + 0.197$  (V vs. NHE).

## 2. Figures

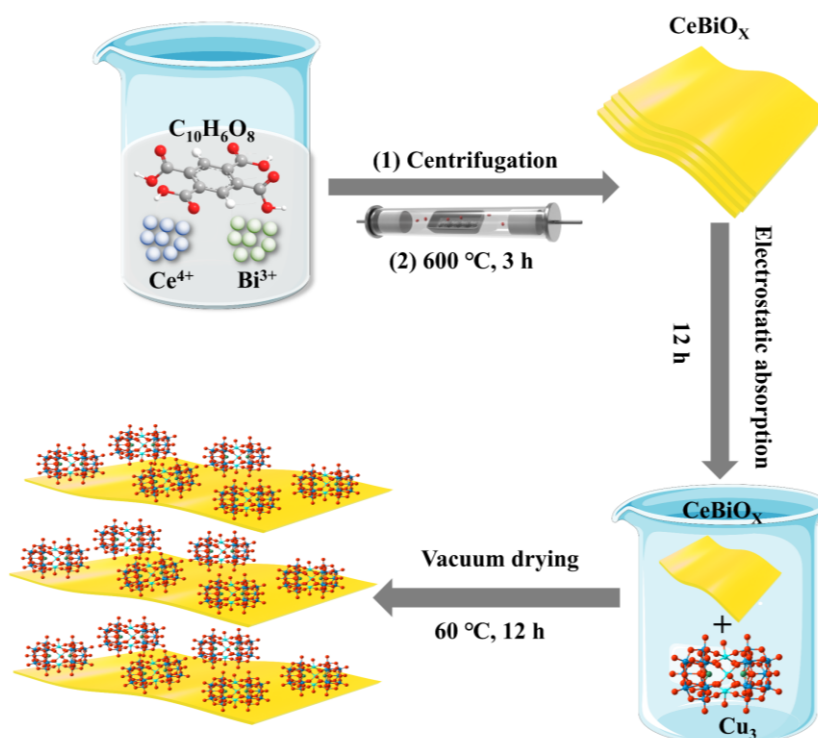

Fig. S1 Schematic illustration for the synthesis of  $CeBiO_x$  and the  $Cu_3/CeBiO_x$  composite.

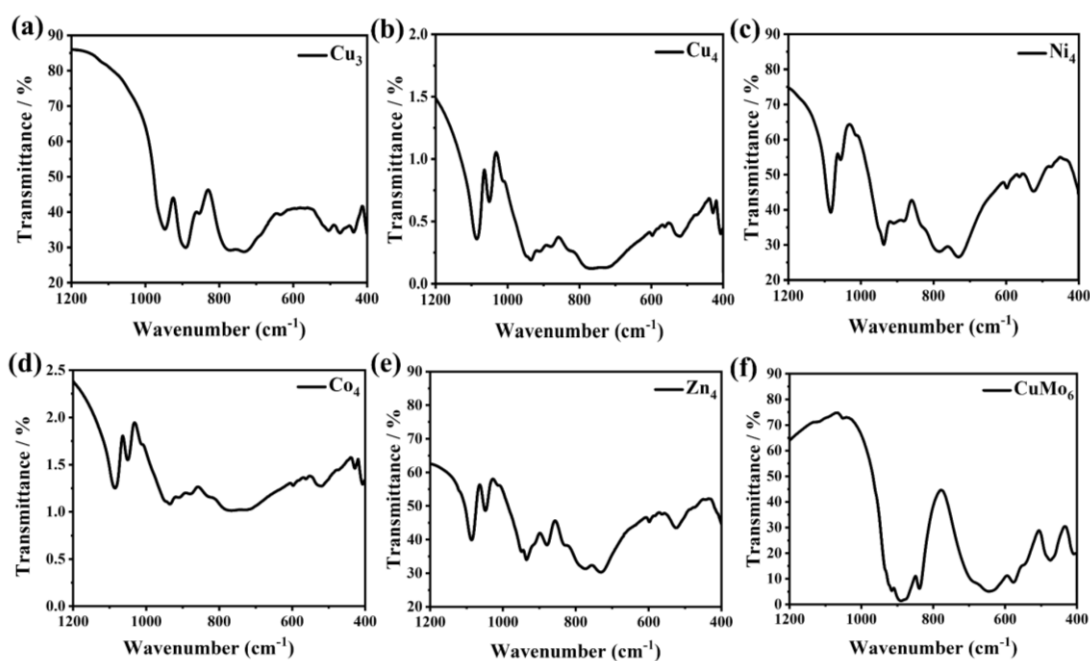

Fig. S2 FT-IR spectra of  $Cu_3$ ,  $Cu_4$ ,  $Ni_4$ ,  $Co_4$ ,  $Zn_4$  and  $CuMo_6$ .

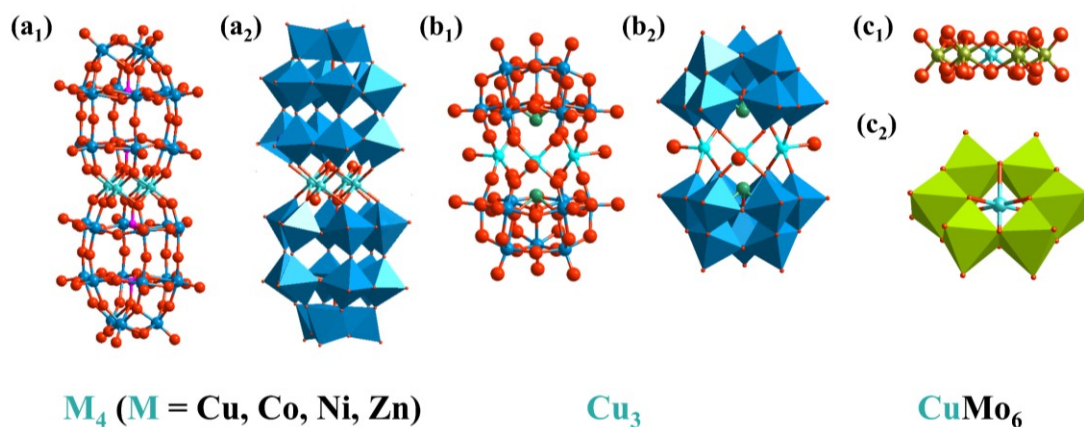

**Fig. S3** (a) Combined polyhedral/ball-and-stick representations of the structures of  $\text{M}_4$  ( $\text{M} = \text{Cu, Co, Ni, Zn}$ ), (b) Combined polyhedral/ball-and-stick representations of the structure of  $\text{Cu}_3$ , (c) Combined polyhedral/ball-and-stick representations of the structure of  $\text{CuMo}_6$ .

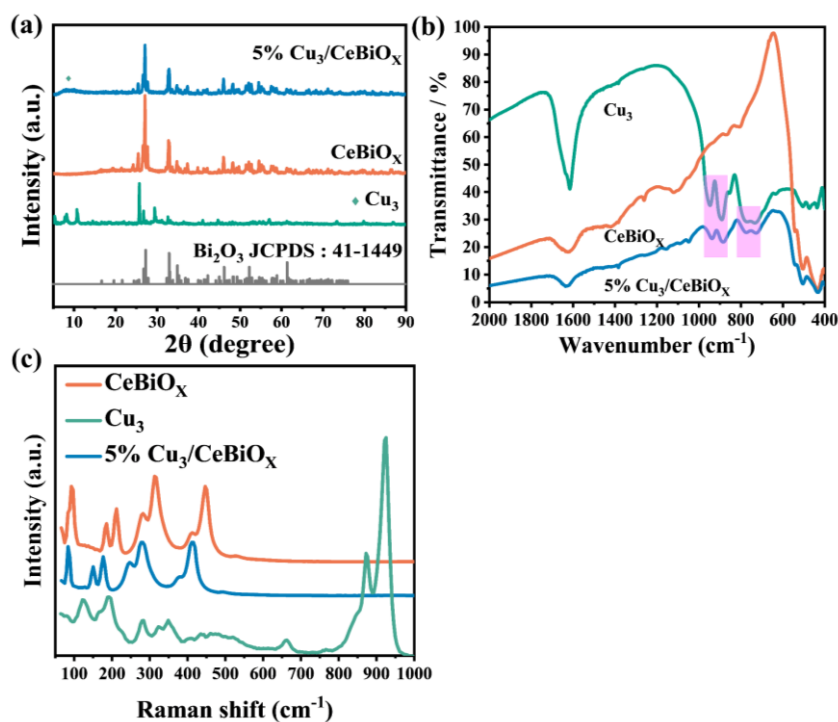

**Fig. S4** (a) The XRD patterns of  $\text{CeBiO}_x$ , 5%  $\text{Cu}_3/\text{CeBiO}_x$  and  $\text{Cu}_3$ , (b) FT-IR spectra of  $\text{CeBiO}_x$ , 5%  $\text{Cu}_3/\text{CeBiO}_x$ , (c) Raman spectra of  $\text{CeBiO}_x$  and 5%  $\text{Cu}_3/\text{CeBiO}_x$ .

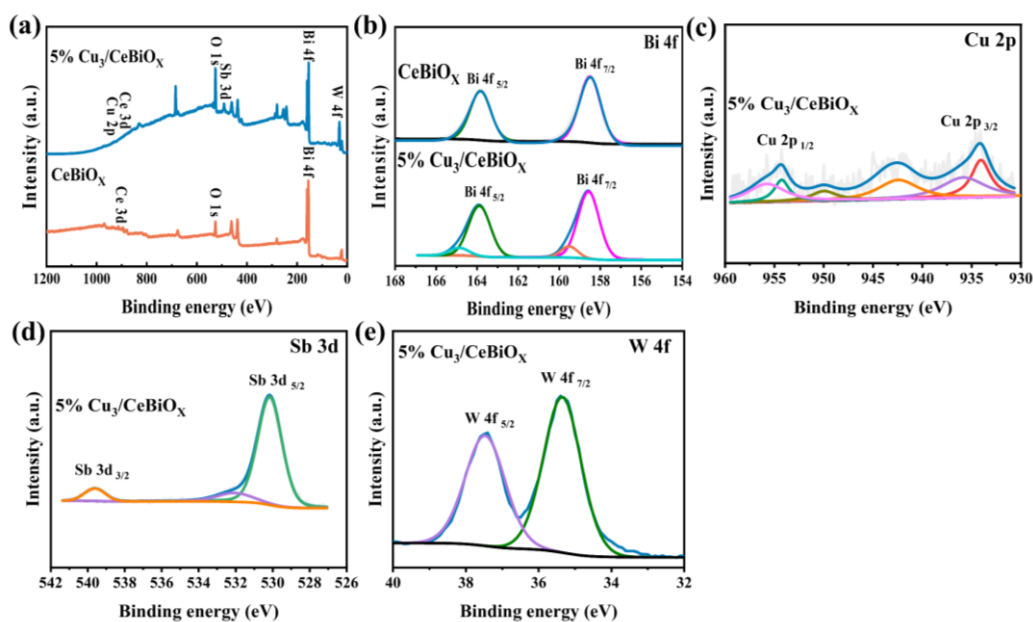

**Fig. S5** (a) Full-scan XPS spectrum of  $\text{CeBiO}_x$  and 5%  $\text{Cu}_3/\text{CeBiO}_x$ , High-resolution XPS spectra of (b) Bi 4f, (c) Cu 2p, (d) Sb 3d and (e) W 4f for 5%  $\text{Cu}_3/\text{CeBiO}_x$ .

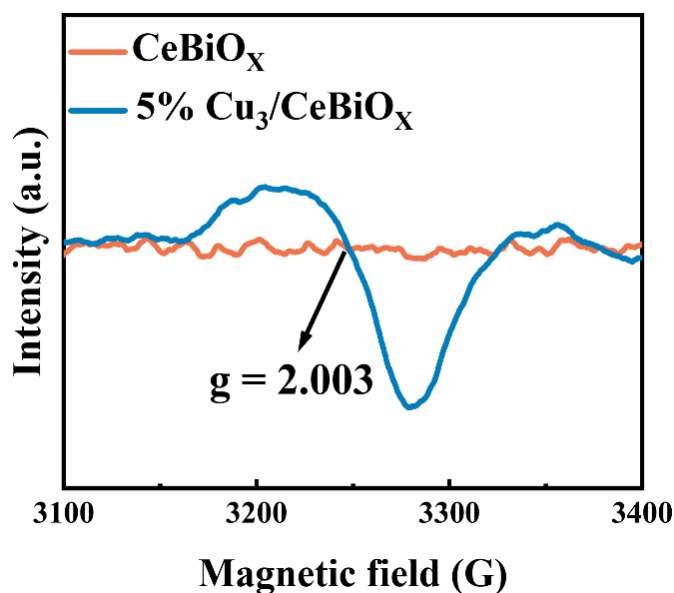

**Fig. S6** ESR spectra of  $\text{CeBiO}_x$  and 5%  $\text{Cu}_3/\text{CeBiO}_x$ , the fluctuations in the ESR spectrum of  $\text{CeBiO}_x$  are attributed to the instrument baseline fluctuations.

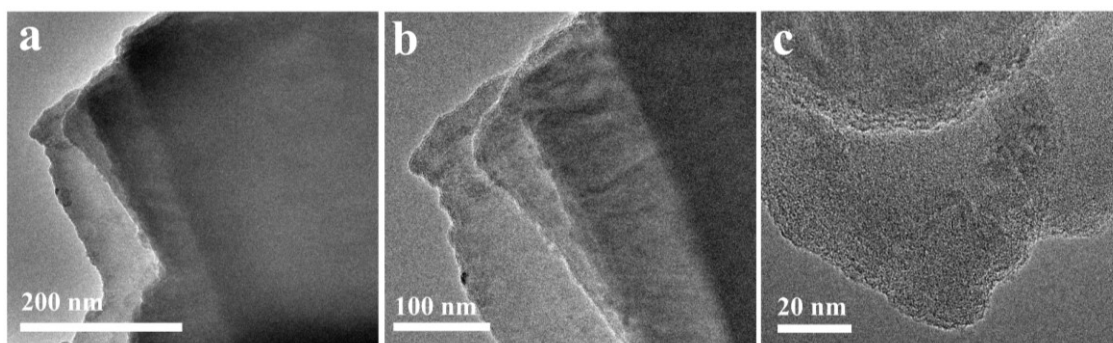

**Fig. S7** (a-c) TEM images of 5%  $\text{Cu}_3/\text{CeBiO}_x$ .

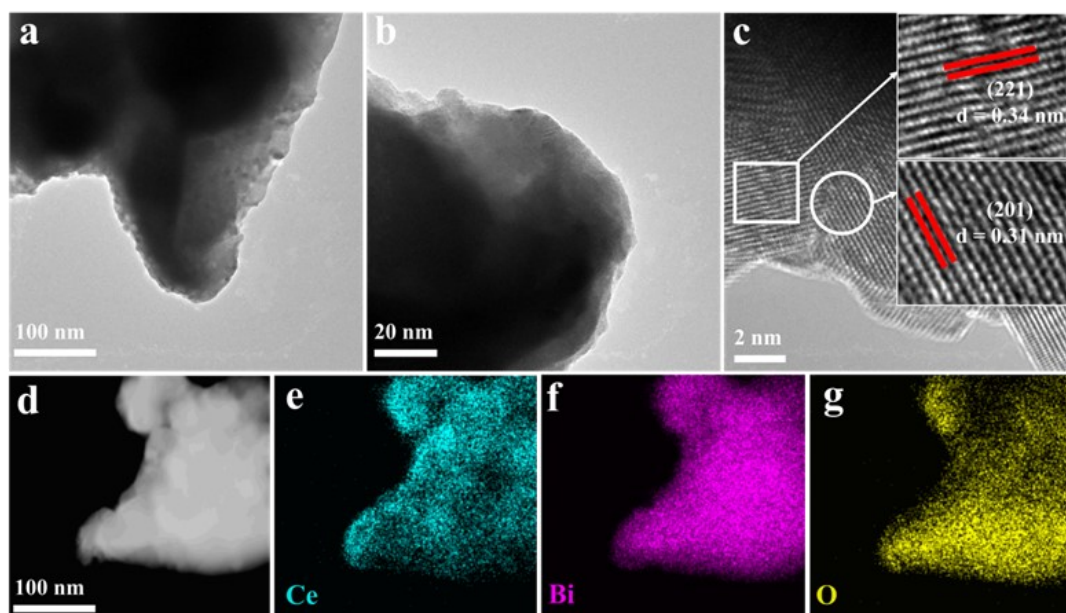

**Fig. S8** (a) and (b) TEM images of  $\text{CeBiO}_x$ , (c) HR-TEM images of  $\text{CeBiO}_x$ , (d) STEM and (e-g) the corresponding EDX mapping images of  $\text{CeBiO}_x$ .

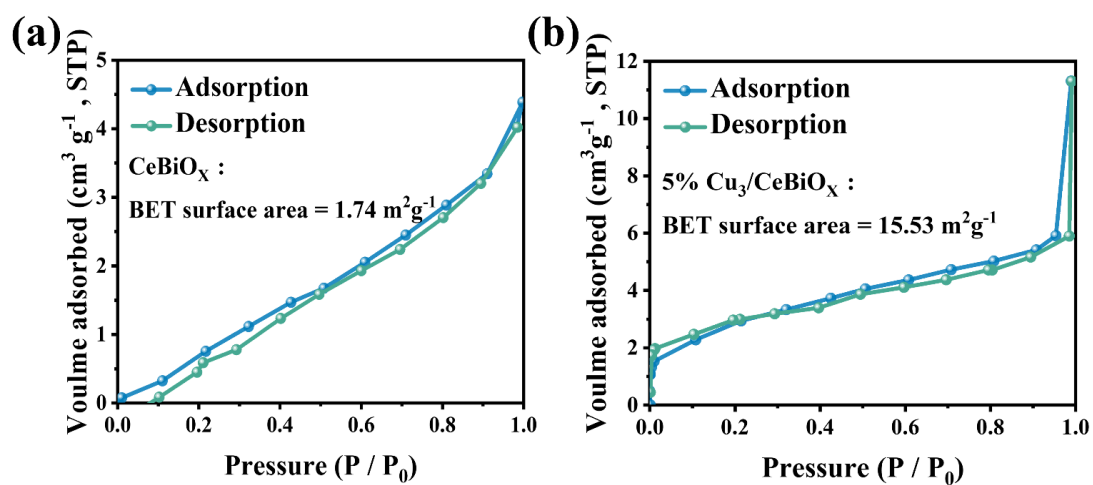

**Fig. S9** N<sub>2</sub> adsorption-desorption isotherms of (a) CeBiO<sub>x</sub> and (b) 5% Cu<sub>3</sub>/CeBiO<sub>x</sub>.

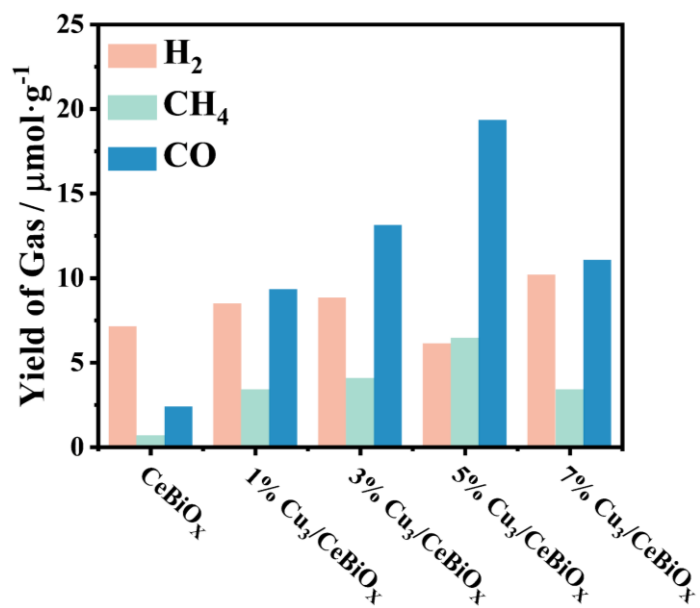

**Fig. S10** Production rates of H<sub>2</sub>, CO and CH<sub>4</sub> on CeBiO<sub>x</sub> and Cu<sub>3</sub>/CeBiO<sub>x</sub> with various loading amounts.

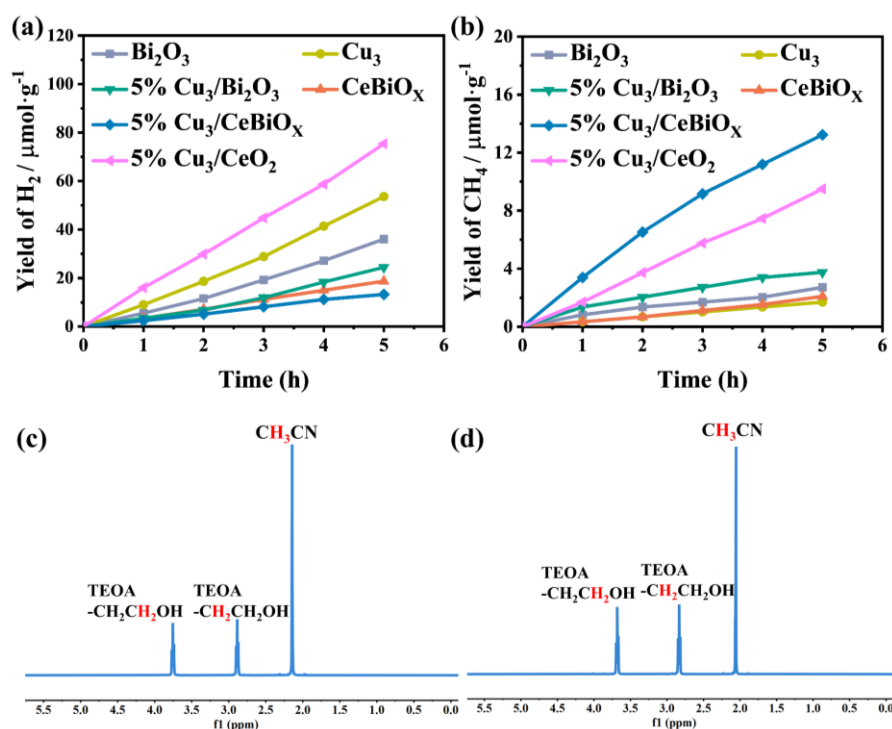

**Fig. S11** (a) H<sub>2</sub> and (b) CH<sub>4</sub> yields as function of the irradiation time with Bi<sub>2</sub>O<sub>3</sub>, Cu<sub>3</sub>, CeBiO<sub>x</sub>, 5% Cu<sub>3</sub>/CeO<sub>2</sub>, 5% Cu<sub>3</sub>/Bi<sub>2</sub>O<sub>3</sub> and 5% Cu<sub>3</sub>/CeBiO<sub>x</sub> as catalysts, <sup>1</sup>H-NMR spectra of the organic solutions formed after the reaction of (c) CeBiO<sub>x</sub> and (d) 5% Cu<sub>3</sub>/CeBiO<sub>x</sub>.

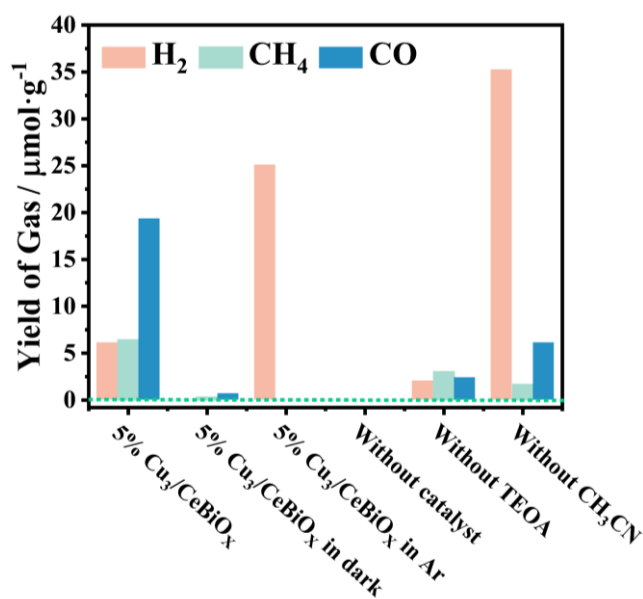

**Fig. S12** Control experiments of photocatalytic CO<sub>2</sub> reduction under different conditions.

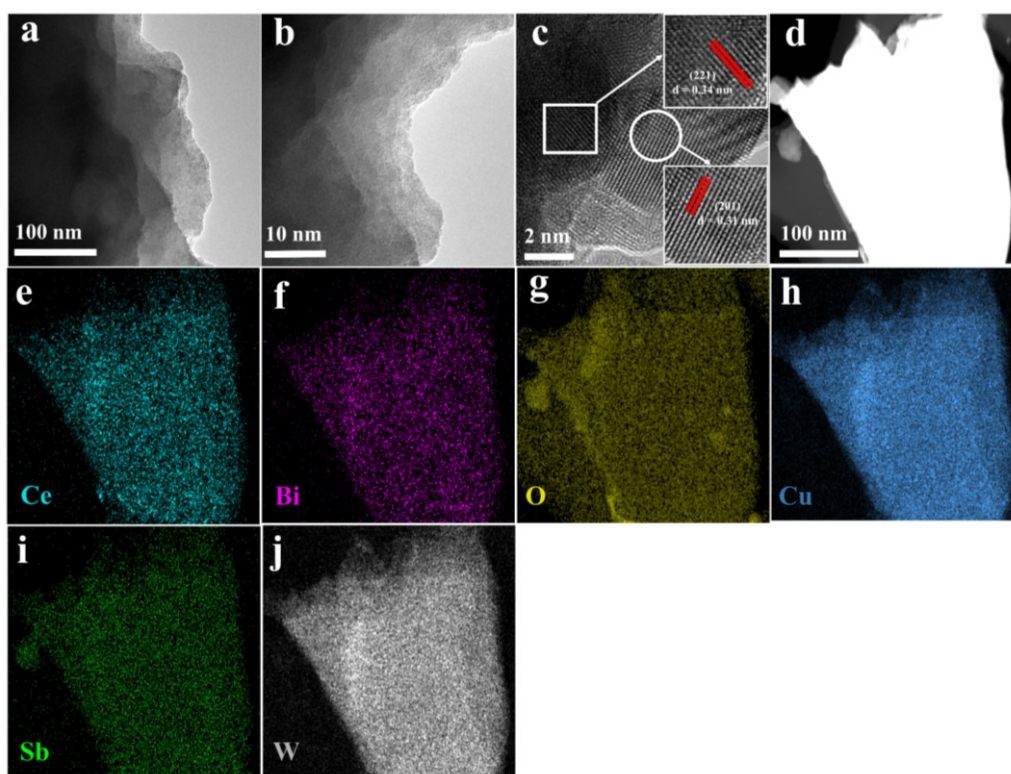

**Fig. S13** (a) and (b)TEM images, (c) HR-TEM images, (d) STEM and (e-j) the corresponding EDX mapping images of 5%  $\text{Cu}_3/\text{CeBiO}_x$  before and after 5 cycles of photocatalytic reactions.

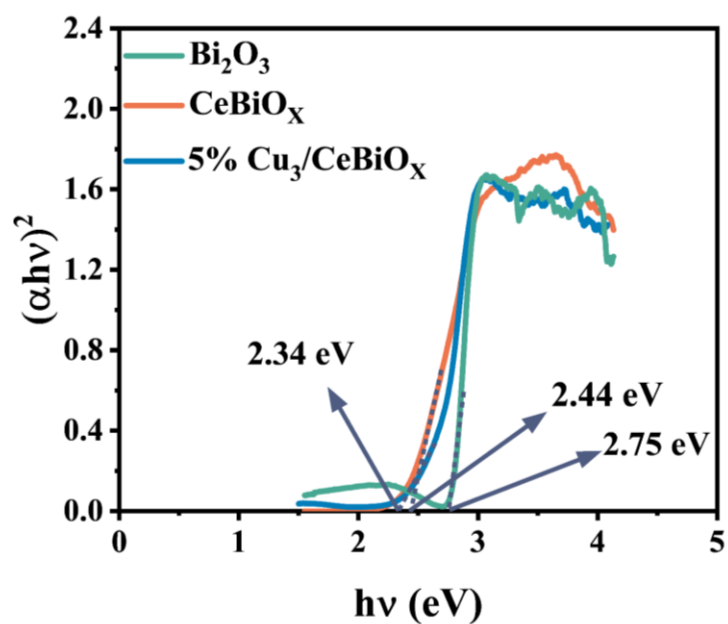

**Fig. S14** Tauc plots of  $\text{Bi}_2\text{O}_3$ ,  $\text{CeBiO}_x$  and 5%  $\text{Cu}_3/\text{CeBiO}_x$ .

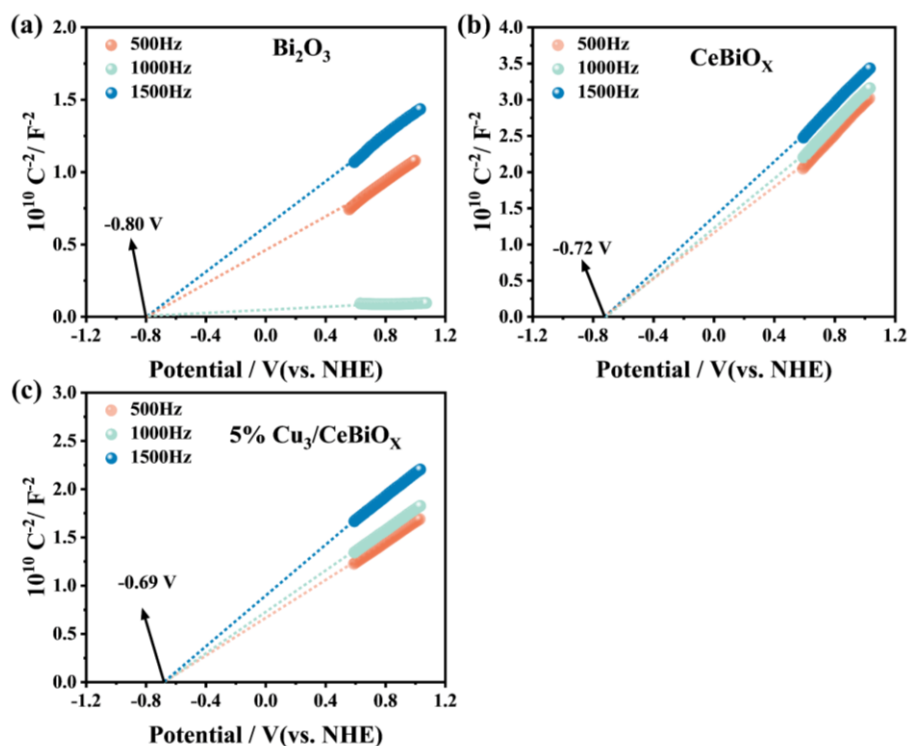

**Fig. S15** Mott-schottky curves of (a)  $\text{Bi}_2\text{O}_3$ , (b)  $\text{CeBiO}_x$  and (c) 5%  $\text{Cu}_3/\text{CeBiO}_x$ .

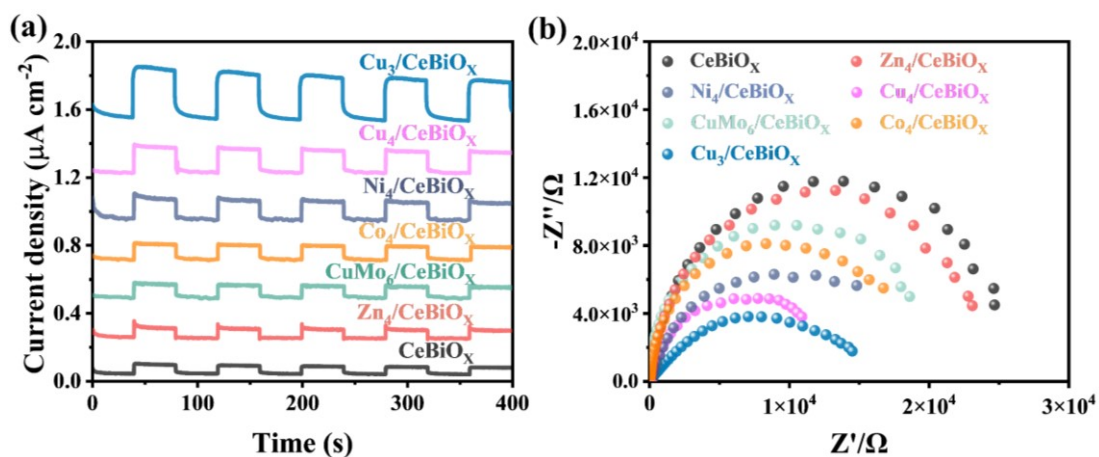

Fig. S16 Photocurrent curves and Nyquist plots of  $\text{CeBiO}_x$  and POMs/ $\text{CeBiO}_x$ .

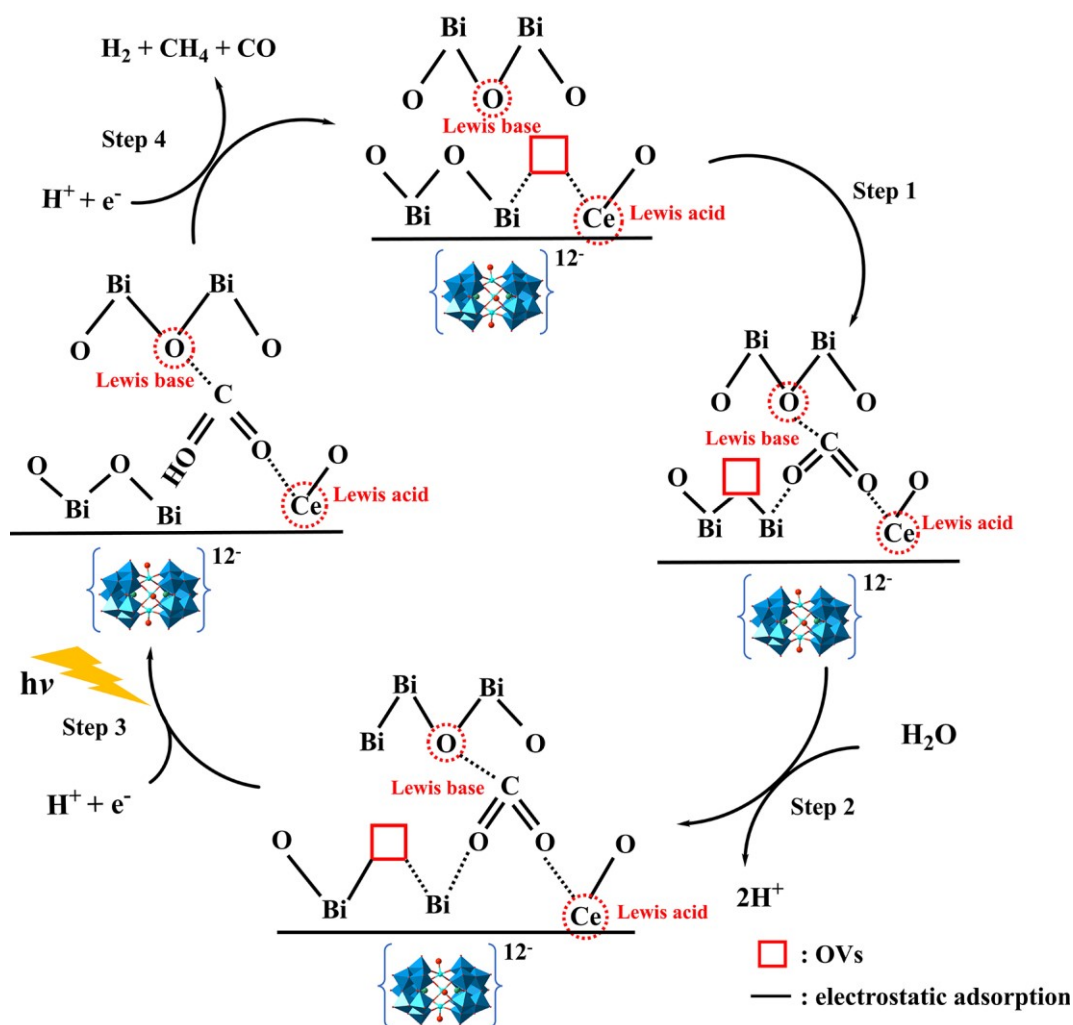

Fig. S17 Possible frustrated Lewis pairs and photocatalytic mechanism for 5%  $\text{Cu}_3/\text{CeBiO}_x$ .

Table S1 Zeta Potential of CeBiO<sub>x</sub> and Cu<sub>3</sub> samples.

| Sample             | Zeta Potential (mV) | Mean (mV) |
|--------------------|---------------------|-----------|
| CeBiO <sub>x</sub> | 22.8                | 24.4      |
|                    | 21.8                |           |
|                    | 28.5                |           |
| Cu <sub>3</sub>    | -28.5               | -29.2     |
|                    | -25.4               |           |
|                    | -33.7               |           |

## References

1. Z. Wang, J. Zhu, X. Zu, Y. Wu, S. Shang, P. Ling, P. Qiao, C. Liu, J. Hu, Y. Pan, J. Zhu, Y. Sun, Y. Xie, *Angew. Chem. Int. Ed.*, 2022, **61**, 30, e202203249.
2. R. G. Finke, M. W. Droege, *Inorg. Chem.*, 1983, **22**, 6, 1006-1008.
3. H. Zhang, T. Su, S. Yu, W. Liao, W. Ren, Z. Zhu, K. Yang, C. Len b, G. Dong, D. Zhao, H. Lü, *Mol. Catal.*, 2023, **536**, 112916.
4. U. Kortz, N. K. A. Kassem, M. G. Savelieff, N. A. A. Kadi, M. Sadakane, *Inorg. Chem.*, 2001, **40**, 18, 4742 9.
